# Supplementary material
Source: Springer Nature journal article supplement (https://www.springermedizin.de/resource/supplementary/13014_2011_461_MOESM6_ESM.pdf/9633442)

C S HIT HIT+S

KHOS-24OS

$\gamma$ H2AX

p21

$\beta$ -Actin

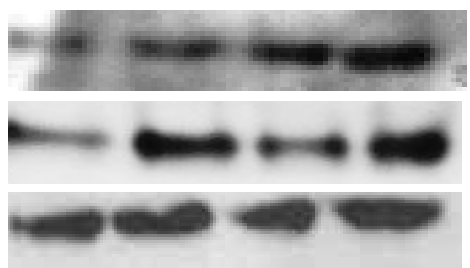

C S HIT HIT+S

A-204

$\gamma$ H2AX

p21

$\beta$ -Actin

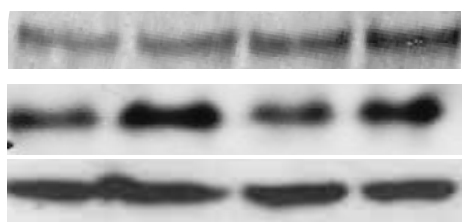

C S HIT HIT+S

hFOB 1.19

$\gamma$ H2AX

p21

$\beta$ -Actin

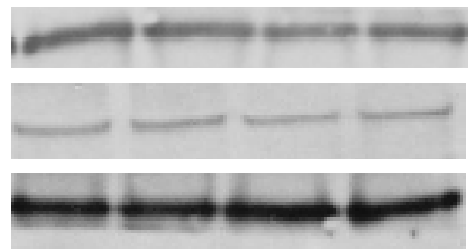

Supplement: MOESM6 [file 9633442]
